# Supplementary material
Source: PubMed Central journal article supplement (PMC10121653)
Supplement: 41598_2023_33810_MOESM1_ESM.pdf [file 41598_2023_33810_MOESM1_ESM.pdf]

**Impairments following COVID-19 infection: Manifestations and investigations of  
related factors**

Farzaneh Badinlou, David Forsström, Markus Jansson-Fröjmark, Tamar Abzhandadze, &  
Tobias Lundgren

Supplemental material. Items of post-COVID impairments according to ICF

| ICF code                                         | Item                                                                                                                                               |
|--------------------------------------------------|----------------------------------------------------------------------------------------------------------------------------------------------------|
| <b>Impairments in mental functions</b>           |                                                                                                                                                    |
| b114                                             | Impaired orientation functions such as difficulty of knowing and ascertaining one's relation to self, to others, to time and to one's surroundings |
| b 1300                                           | Brain fatigue                                                                                                                                      |
| b 1302                                           | Lack of appetite                                                                                                                                   |
| b 134                                            | Sleep problems                                                                                                                                     |
| b 140                                            | Concentration problem such as difficulty of focusing on a task or topic                                                                            |
| b 140                                            | Attention problem such as difficulty of focusing on one part of an experience and ignoring others or focusing on several things                    |
| b 144                                            | Memory problem                                                                                                                                     |
| b 1641                                           | Impaired organization and planning such as difficulty of coordinating parts into a whole)                                                          |
| b 167                                            | Impaired mental functions of language such as difficulty of recognizing and using signs, symbols and other components of a language                |
| b 152                                            | Depression                                                                                                                                         |
| b 152                                            | Worry/ anxiety                                                                                                                                     |
| b 152                                            | Stress                                                                                                                                             |
| b 160                                            | Obsessions such as unwanted thoughts and fears                                                                                                     |
| b 160                                            | Compulsions such as you feel compelled to do certain things                                                                                        |
| <b>Impairments in sensory functions and pain</b> |                                                                                                                                                    |
| b 2102                                           | Impaired quality of vision                                                                                                                         |
| b 220                                            | Dry / red / itchy eyes                                                                                                                             |
| b 2400                                           | Ringing in ears or tinnitus                                                                                                                        |
| b 2401                                           | Dizziness                                                                                                                                          |
| b 235                                            | Disturbed balance                                                                                                                                  |
| b 250                                            | Loss of taste                                                                                                                                      |
| b 255                                            | Loss of smell                                                                                                                                      |
| b 265                                            | Feeling of numbness / tingling                                                                                                                     |
| b 2800                                           | Generalized pain                                                                                                                                   |
| b 28010                                          | Pain in head                                                                                                                                       |
| b 28011                                          | Chest pain                                                                                                                                         |
| b 28012                                          | Pain in stomach or abdomen                                                                                                                         |
| b 28016                                          | Joint pain                                                                                                                                         |
| b 2802                                           | Pain in multiple body parts                                                                                                                        |
| <b>Impairments in body system functions</b>      |                                                                                                                                                    |
| b 310                                            | Voice problems                                                                                                                                     |
| b 410                                            | Impaired heart functions                                                                                                                           |
| b 440                                            | Respiratory distress                                                                                                                               |
| b 450                                            | Cough                                                                                                                                              |
| b 4552                                           | Tiredness or lack of energy (Fatiguability)                                                                                                        |
| b 460                                            | Shortness of breath                                                                                                                                |
| b 5105                                           | Sore throat/ difficult to swallow                                                                                                                  |
| b 5106                                           | Vomiting                                                                                                                                           |
| b 515                                            | Impaired nutrient uptake                                                                                                                           |
| b 525                                            | Diarrhoea                                                                                                                                          |

|                                                    |                                                                        |
|----------------------------------------------------|------------------------------------------------------------------------|
| b 530                                              | Weight change                                                          |
| b 5350                                             | Nausea                                                                 |
| b 5500                                             | Fever/ feeling of fever                                                |
| b 5500                                             | Chills or the feeling of freezing                                      |
| b 640                                              | Impaired sexual desire and functions                                   |
| b 710                                              | Impaired mobility such as difficulty to move knee, ankle, hands, feet. |
| b 730                                              | Decreased muscle power                                                 |
| b 760                                              | Impaired control over and coordination of movements                    |
| b 810                                              | Skin changes                                                           |
| b 840                                              | Rash/ itching                                                          |
| b 850                                              | Hair loss                                                              |
| <b>Impairments in activities and participation</b> |                                                                        |
| d 5                                                | Difficulty taking care of yourself                                     |
| d 5                                                | Impaired control of other diseases and drugs, keep special diet        |
| d 6                                                | Difficulties in doing housework                                        |
| d 8                                                | Impaired work ability / study ability                                  |
| d 9                                                | Difficulty being to leisure activities                                 |
